# Supplementary material for: Chemical Composition and Geographic Variation of Cold Pressed Balanites aegyptiaca Kernel Oil
Source: MDPI journal article supplement (doi:10.3390/foods13071135), 2024-04-08
Supplement: s1 [file s1]

**Table S1.** Additional information on sample set

| Sample Code | Harvest location               | Description                                                                                                                                                                          |
|-------------|--------------------------------|--------------------------------------------------------------------------------------------------------------------------------------------------------------------------------------|
| Mo1         | <i>Tata</i> - Morocco          | <i>Balanites</i> fruits were collected From <i>Tata</i> (Morocco) in 2020 and the extraction was done as described in the method part                                                |
| Mo2         | <i>Tata</i> - Morocco          | <i>Balanites</i> fruit were collected From <i>Tata</i> (Morocco) in 2021 and the extraction was done as described in the method part                                                 |
| Mo3         | <i>Tata</i> – Morocco          | <i>Balanites</i> fruit were collected From <i>Tata</i> (Morocco) in 2022 and the extraction was done as described in the method part                                                 |
| Mau1        | <i>Guidimakha</i> – Mauritania | Cosmetic <i>Balanites</i> kernel oil (extracted from non-roasted kernels) was purchased from a local cooperative in <i>Guidimakha</i> , in Mauritania                                |
| Mau2        | <i>Guidimakha</i> – Mauritania | Alimentary <i>Balanites</i> kernel oil (extracted from kernels roasted for 10 min at 100 °C in the oven) was purchased from a local cooperative in <i>Guidimakha</i> , in Mauritania |
| Su1         | <i>El Fulah</i> – Sudan        | <i>Balanites</i> fruits were collected From <i>El Fulah</i> (Sudan) in 2021 and the extraction was done as described in the method part                                              |
| Su2         | <i>Al Fashir</i> – Sudan       | <i>Balanites</i> fruits were collected From <i>Al Fashir</i> (Sudan) in 2021 and the extraction was done as described in the method part                                             |
| Su3         | <i>Al 'Abbasiyah</i> – Sudan   | <i>Balanites</i> fruits were collected From <i>Al 'Abbasiyah</i> (Sudan) in 2021 and the extraction was done as described in the method part                                         |

**Table S2.** Fatty acid composition of *Balanites* kernel oil (%)

| Sample              | Mo1      | Mo2      | Mo3      | Mau1     | Mau2     | Su1      | Su2      | Su3      |
|---------------------|----------|----------|----------|----------|----------|----------|----------|----------|
| <b>14:0</b>         | 0.1±0.0  | 0.1±0.0  | nd       | nd       | nd       | nd       | 0.1±0.0  | 0.1±0.0  |
| <b>16:0</b>         | 14.5±0.5 | 12.8±0.1 | 13.9±0.4 | 11.5±0.3 | 11.3±0.2 | 11.1±0.1 | 12.8±0.1 | 12.5±0.1 |
| <b>16:1 Δ9</b>      | 0.1±0.0  | 0.1±0.0  | nd       | nd       | nd       | nd       | 0.1±0.0  | 0.1±0.0  |
| <b>17:0</b>         | 0.1±0.0  | 0.1±0.0  | 0.1±0.0  | 0.1±0.0  | 0.1±0.0  | 0.1±0.0  | 0.1±0.0  | 0.1±0.0  |
| <b>18:0</b>         | 11.1±0.2 | 9.7±0.0  | 11.0±0.1 | 13.0±0.1 | 12.8±0.1 | 11.3±0.0 | 12.7±0.0 | 12.6±0.0 |
| <b>18:1Δ9</b>       | 23.4±0.1 | 28.3±0.1 | 27.3±0.0 | 33.3±0.0 | 33.8±0.0 | 35.6±0.0 | 34.4±0.1 | 31.7±0.1 |
| <b>18:1Δ11</b>      | 0.8±0.0  | 1.2±0.0  | 1.0±0.0  | 0.8±0.0  | 0.8±0.0  | 1.2±0.0  | 1.0±0.0  | 0.9±0.0  |
| <b>18:2Δ9t,12 t</b> | nd       | 0.1±0.0  | 0.1±0.0  | 0.1±0.0  | 0.1±0.0  | nd       | nd       | nd       |
| <b>18:2Δ9,12</b>    | 48.5±0.3 | 44.4±0.1 | 44.6±0.1 | 39.9±0.2 | 39.8±0.1 | 38.6±0.0 | 38.0±0.1 | 41.0±0.0 |
| <b>18:3Δ9,12,15</b> | 0.7±0.0  | 1.7±0.0  | 0.8±0.0  | nd       | nd       | 0.9±0.0  | 0.1±0.0  | 0.1±0.0  |
| <b>20:0</b>         | 0.4±0.0  | 0.4±0.0  | 0.4±0.0  | 0.5±0.0  | 0.5±0.0  | 0.4±0.0  | 0.4±0.0  | 0.4±0.0  |
| <b>20:1Δ11</b>      | 0.2±0.0  | 0.3±0.0  | 0.2±0.0  | 0.1±0.0  | 0.1±0.0  | 0.2±0.0  | 0.1±0.0  | 0.1±0.0  |
| <b>22:0</b>         | 0.1±0.0  | 0.1±0.0  | 0.1±0.0  | 0.1±0.0  | 0.1±0.0  | 0.1±0.0  | 0.1±0.0  | 0.1±0.0  |
| <b>24:0</b>         | 0.1±0.0  | 0.5±0.0  | 0.2±0.0  | 0.1±0.0  | 0.1±0.0  | 0.1±0.0  | 0.1±0.0  | 0.1±0.0  |

Results are expressed as mean ± SD (n = 3), nd: not detected

**Table S3.** Triacylglycerol composition of *Balanites* kernel oil (%)

| Sample | Mo1      | Mo2      | Mo3      | Mau1     | Mau2     | Su1      | Su2      | Su3      |
|--------|----------|----------|----------|----------|----------|----------|----------|----------|
| PaOlPa | 2.4±0.0  | 2.3±0.0  | 2.8±0.0  | 2.4±0.0  | 2.6±0.0  | 2.6±0.0  | 3.2±0.0  | 2.8±0.0  |
| PaLiPa | 7.0±0.0  | 6.2±0.0  | 6.2±0.0  | 3.1±0.0  | 3.1±0.0  | 3.6±0.0  | 4.3±0.0  | 4.4±0.0  |
| PaOlSt | 2.7±0.0  | 2.5±0.0  | 3.1±0.0  | 3.3±0.0  | 4.1±0.0  | 4.0±0.0  | 4.5±0.1  | 4.4±0.0  |
| PaOlOl | 3.8±0.0  | 4.6±0.0  | 5.3±0.0  | 8.2±0.0  | 8.3±0.0  | 7.6±0.0  | 8.7±0.1  | 7.2±0.0  |
| PaLiSt | 8.8±0.0  | 7.7±0.0  | 7.9±0.0  | 4.8±0.0  | 5.3±0.0  | 5.7±0.0  | 6.8±0.1  | 6.9±0.0  |
| PaLiOl | 14.6±0.0 | 13.9±0.0 | 15.4±0.0 | 14.1±0.0 | 13.7±0.0 | 13.7±0.1 | 14.7±0.1 | 14.8±0.1 |
| PaLiLi | 16.5±0.0 | 14.7±0.0 | 13.9±0.0 | 9.5±0.0  | 9.1±0.0  | 9.0±0.1  | 8.6±0.1  | 9.9±0.1  |
| StOlSt | 0.8±0.0  | 0.7±0.0  | 0.9±0.0  | 1.3±0.0  | 1.8±0.0  | 1.8±0.1  | 1.8±0.1  | 1.8±0.1  |
| StOlOl | 1.9±0.0  | 2.1±0.0  | 2.6±0.0  | 6.3±0.0  | 6.2±0.0  | 5.2±0.1  | 5.4±0.1  | 4.9±0.1  |
| OlOlOl | 3.3±0.0  | 6.8±0.0  | 4.5±0.0  | 6.3±0.0  | 6.5±0.0  | 7.5±0.0  | 6.1±0.1  | 4.8±0.1  |
| StLiOl | 8.4±0.0  | 8.0±0.0  | 9±0.0    | 11.1±0.0 | 10.7±0.0 | 9.4±0.1  | 9.9±0.1  | 9.9±0.1  |
| OlLiOl | 7.2±0.0  | 9.1±0.0  | 8.8±0.0  | 11.4±0.0 | 11.2±0.0 | 11.9±0.0 | 10.8±0.0 | 10.3±0.0 |
| LiLiOl | 13.2±0.0 | 13.1±0.0 | 12.8±0.0 | 12.2±0.0 | 11.7±0.0 | 12.5±0.0 | 11.0±0.0 | 12.2±0.0 |
| LiLiLi | 9.2±0.0  | 8.2±0.0  | 6.9±0.0  | 6.0±0.0  | 5.8±0.0  | 5.7±0.0  | 4.2±0.0  | 5.7±0.0  |

Results are expressed as mean ± SD (n = 3)

Pa: palmitic acid, St: searic acid, Ol: oleic acid, Li: linoleic acid

**Table S4.** Tocochromanol composition of *Balanites* kernel oil (mg/kg of oil)

|                                        | <b>Mo1</b>   | <b>Mo2</b>  | <b>Mo3</b>  | <b>Mau1</b>    | <b>Mau2</b> | <b>Su1</b>     | <b>Su2</b>     | <b>Su3</b>   |
|----------------------------------------|--------------|-------------|-------------|----------------|-------------|----------------|----------------|--------------|
| <b><math>\alpha</math>-tocopherol</b>  | 607 $\pm$ 20 | 574 $\pm$ 2 | 551 $\pm$ 7 | 445 $\pm$ 8    | 426 $\pm$ 5 | 365 $\pm$ 9    | 324 $\pm$ 7    | 404 $\pm$ 17 |
| <b><math>\beta</math>-tocopherol</b>   | 17 $\pm$ 1   | 13 $\pm$ 0  | 10 $\pm$ 0  | 7 $\pm$ 0      | 7 $\pm$ 0   | 1 $\pm$ 0 <LOQ | 1 $\pm$ 0 <LOQ | 2 $\pm$ 0    |
| <b><math>\gamma</math>-tocopherol</b>  | 175 $\pm$ 4  | 212 $\pm$ 1 | 226 $\pm$ 2 | 120 $\pm$ 0    | 124 $\pm$ 3 | 183 $\pm$ 1    | 215 $\pm$ 1    | 197 $\pm$ 4  |
| <b><math>\beta</math>-tocotrienol</b>  | nd           | 3 $\pm$ 1   | 4 $\pm$ 1   | nd             | nd          | nd             | nd             | nd           |
| <b>plastochromanol-8</b>               | 5 $\pm$ 0    | 12 $\pm$ 0  | 7 $\pm$ 0   | 2 $\pm$ 0      | 7 $\pm$ 1   | 6 $\pm$ 0      | 3 $\pm$ 1      | 4 $\pm$ 0    |
| <b><math>\gamma</math>-tocotrienol</b> | nd           | 3 $\pm$ 0   | 2 $\pm$ 0   | 1 $\pm$ 0 <LOQ | 4 $\pm$ 0   | 1 $\pm$ 0 <LOQ | 3 $\pm$ 0      | 2 $\pm$ 0    |
| <b><math>\delta</math>-tocopherol</b>  | 14 $\pm$ 1   | 12 $\pm$ 1  | 13 $\pm$ 0  | 11 $\pm$ 1     | 12 $\pm$ 0  | 3 $\pm$ 0      | 5 $\pm$ 0      | 5 $\pm$ 1    |
| <b>Sum</b>                             | 819 $\pm$ 26 | 828 $\pm$ 5 | 812 $\pm$ 9 | 585 $\pm$ 8    | 580 $\pm$ 3 | 559 $\pm$ 10   | 552 $\pm$ 6    | 614 $\pm$ 22 |

Results are expressed as mean  $\pm$  SD (n = 3), nd: not detected, LOQ: limit of quantification

**Table S5.** Phytosterol composition of *Balanites* kernel oil (mg/kg of oil)

| Serols                         | Mo1           | Mo2           | Mo3           | Mau1         | Mau2          | Su1           | Su2          | Su3         |
|--------------------------------|---------------|---------------|---------------|--------------|---------------|---------------|--------------|-------------|
| <b>Cholesterol</b>             | 82.6 ± 2.5    | 112.4 ± 22.1  | 80.3 ± 1.8    | 70.2 ± 0.2   | 77.9 ± 0.9    | 101.8 ± 1.6   | 110.9 ± 0.2  | 102.0 ± 1.0 |
| <b>Brassicasterol</b>          | 51.9 ± 5.6    | 131.1 ± 0.6   | 61.9 ± 1.3    | nd           | nd            | 72.0 ± 4.1    | nd           | nd          |
| <b>24-Methylenecholesterol</b> | 13.0 ± 0.2    | 30.8 ± 0.8    | 14.0 ± 0.6    | 1.9 ± 0.1    | nd            | 19.2 ± 0.2    | 2.8 ± 0.2    | 2.8 ± 0.0   |
| <b>Campesterol</b>             | 194.9 ± 2.7   | 452 ± 0.9     | 204.6 ± 2.6   | 21.0 ± 0.2   | 28.1 ± 2.2    | 260.8 ± 1.9   | 28.6 ± 0.6   | 28.5 ± 0.3  |
| <b>Stigmasterol</b>            | 57.3 ± 1.5    | 53.6 ± 4.7    | 53.6 ± 1.9    | 32.5 ± 2.2   | 49.4 ± 0.7    | 50.9 ± 1      | 58.0 ± 0.8   | 55.9 ± 0.6  |
| <b>Δ7-Campesterol</b>          | 7.4 ± 0.6     | 5.0 ± 0.1     | 5.4 ± 0.3     | 4.8 ± 0.1    | 7.3 ± 0.6     | 4.2 ± 0.9     | 4.2 ± 0.3    | 3.0 ± 0.1   |
| <b>Δ5,23-Stigmastadienol</b>   | 13.6 ± 1.6    | 12.1 ± 0.8    | 9.3 ± 0.3     | 7.9 ± 0.5    | 9.9 ± 1       | 9.1 ± 1.2     | 5.0 ± 0.2    | 5.7 ± 0.7   |
| <b>β-Sitosterol</b>            | 1024.6 ± 16.6 | 1295.3 ± 12.9 | 938.1 ± 11.7  | 723.1 ± 5.4  | 819.3 ± 21.7  | 888.5 ± 5.2   | 569.9 ± 6.8  | 603.3 ± 3.2 |
| <b>Sitostanol</b>              | 9.3 ± 0.7     | 7.6 ± 0.4     | 5.9 ± 0.5     | 4.9 ± 0.6    | 7.5 ± 1.2     | 6.4 ± 0.5     | 6.2 ± 0.2    | 6.2 ± 0.9   |
| <b>Δ5-Avenasterol</b>          | 64.0 ± 0.9    | 100.2 ± 2.8   | 54.6 ± 8.1    | 116.7 ± 2.9  | 85.4 ± 7      | 105.4 ± 7.2   | 80.0 ± 2.1   | 76.5 ± 1.7  |
| <b>Δ5,24-Stigmastadienol</b>   | 6.5 ± 0.7     | 7.3 ± 0.6     | 3.9 ± 0.9     | 4.8 ± 0.4    | 4.1 ± 1       | 4.7 ± 0.2     | 3.4 ± 0.5    | 3.4 ± 0.3   |
| <b>Δ7-Stigmastenol</b>         | 5.1 ± 0.1     | 3.6 ± 0.7     | 2.4 ± 0.2     | 2.8 ± 0.4    | 20.1 ± 1.1    | 1.8 ± 0.4     | 1.3 ± 0.3    | nd          |
| <b>Δ7-Avenasterol</b>          | 5.2 ± 0.7     | 6.5 ± 0.1     | 1.6 ± 0.4     | 7.3 ± 0.3    | 2.0 ± 0.4     | 1.1 ± 0.2     | 1.0 ± 0.2    | nd          |
| <b>Sum</b>                     | 1535.5 ± 27.4 | 2217.7 ± 6.2  | 1435.5 ± 19.9 | 997.8 ± 10.3 | 1111.0 ± 32.6 | 1526.0 ± 19.8 | 871.3 ± 10.4 | 887.3 ± 7.2 |

Results are expressed as mean ± SD (n = 3), nd: not detected

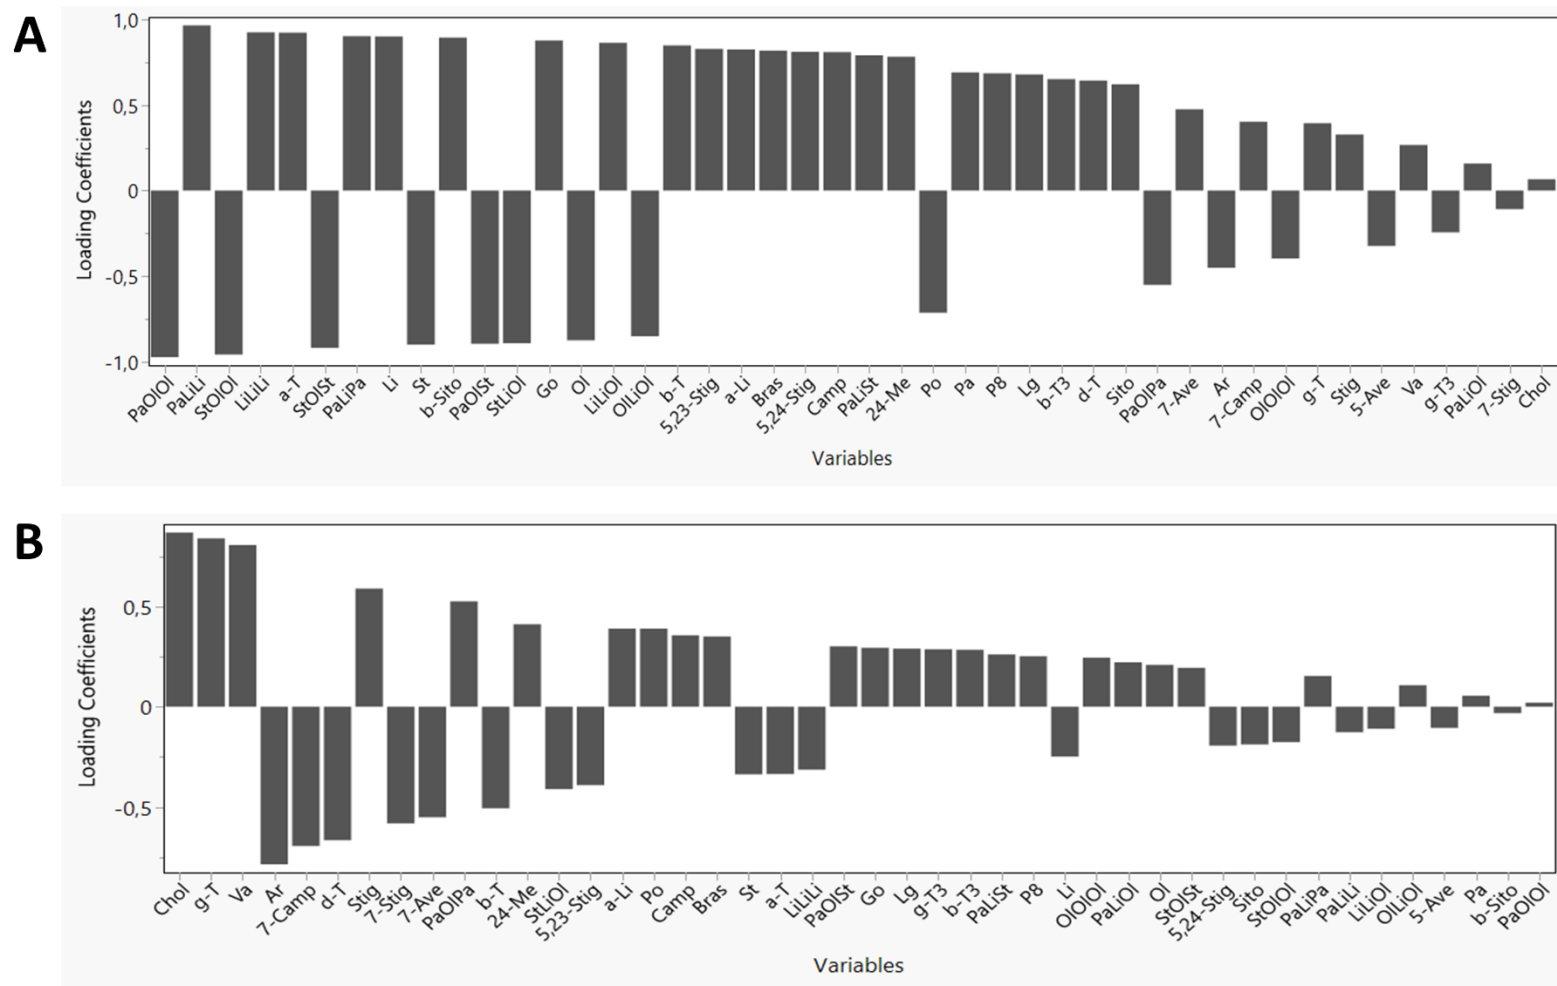

**Figure S1.** Loadings of the two principal component analysis, A: for PC1 and B: for PC2. Ol: oleic acid, Va: Vaccenic acid, Li: Linoleic acid, a-Li:  $\alpha$ -linolenic acid, Ar: arachidic acid, Go: gondoic acid, Lg: lignoceric acid, a-T:  $\alpha$ -tocopherol, b-T:  $\beta$ -tocopherol, g-T:  $\gamma$  tocopherol, b-T3:  $\beta$ -tocotrienol, P8: Plastochromanol-8, g-T3:  $\gamma$ -tocotrienol, d-T:  $\delta$ -tocopherol, Chol: Cholesterol, Bras: brassicasterol, 24-Me: 24-methylenecholesterol, Camp: campesterol, Stig: stigmasterol, 7-Camp:  $\Delta$ 7-campesterol, 5,23-Stig:  $\Delta$ 5,23-stigmastadienol, b-Sito:  $\beta$ -sitosterol, Sito: sitostanol, 5-Ave:  $\Delta$ 5-avenasterol, 5,24-Stig:  $\Delta$ 5,24-stigmastadienol, 7-Stig:  $\Delta$ 7-stigmastanol, 7-Ave:  $\Delta$ 7-avenasterol.
